# Supplementary material for: A Convenient Route to 4-Carboxy-4-Anilidopiperidine Esters and Acids
Source: Molecules. 2012 Mar 7;17(3):2823–32. doi: 10.3390/molecules17032823 (PMC6268299; doi:10.3390/molecules17032823)

Article

# A Convenient Route to 4-Carboxy-4-Anilidopiperidine Esters and Acids

János Marton <sup>1</sup>, Brita Glaenzel <sup>1</sup>, Julia Roessler <sup>1,†</sup>, Daniela Golaszewski <sup>1</sup> and Gjermund Henriksen <sup>2,‡,\*</sup>

<sup>1</sup> ABX Advanced Biochemical Compounds, Biomedizinische Forschungsreagenzien GmbH, Heinrich-Glaeser-Strasse 10-14, D-01454 Radeberg, Germany; E-Mails: marton@abx.de (J.M.); glaenzel@abx.de (B.G.); julia.roessler@chemie.tu-dresden.de (J.R.); golaszewski@abx.de (D.G.)

<sup>2</sup> Department of Nuclear Medicine, Klinikum rechts der Isar, Technische Universität München, Ismaninger Strasse 22, D-81675 Munich, Germany

<sup>†</sup> Present Address: Department of Chemistry and Food Chemistry, Organic Chemistry I, Dresden University of Technology, Bergstrasse 66, D-01069 Dresden, Germany.

<sup>‡</sup> Present Address: Scintomics Up North AS, Utveien 15, N-1430 As, Norway.

\* Author to whom correspondence should be addressed; E-Mail: henriksen@scintomics.no; Tel.: +47-978-70-357.

Received: 3 January 2012; in revised form: 20 February 2012 / Accepted: 24 February 2012 /

Published: 7 March 2012

## Supporting Information

|                                                                                       |    |
|---------------------------------------------------------------------------------------|----|
| <sup>1</sup> H-NMR spectrum of <b>5d</b> in CDCl <sub>3</sub>                         | 2  |
| <sup>13</sup> C-NMR spectrum of <b>5d</b> in CDCl <sub>3</sub>                        | 3  |
| <sup>1</sup> H-NMR spectrum of <b>6d</b> in CDCl <sub>3</sub>                         | 4  |
| <sup>13</sup> C-NMR spectrum of <b>6d</b> in CDCl <sub>3</sub>                        | 5  |
| <sup>1</sup> H-NMR spectrum of <b>6e</b> in CD <sub>3</sub> OD                        | 6  |
| <sup>13</sup> C-NMR spectrum of <b>6e</b> in CD <sub>3</sub> OD                       | 7  |
| <sup>1</sup> H-NMR spectrum of <b>6f</b> in DMSO-d <sub>6</sub>                       | 8  |
| <sup>13</sup> C-NMR spectrum of <b>6f</b> in DMSO-d <sub>6</sub>                      | 9  |
| <sup>1</sup> H-NMR spectrum of <b>6g</b> in DMSO-d <sub>6</sub>                       | 10 |
| <sup>13</sup> C-NMR spectrum of <b>6g</b> in DMSO-d <sub>6</sub> + CD <sub>3</sub> OD | 11 |
| <sup>1</sup> H-NMR spectrum of <b>6h</b> in CD <sub>3</sub> OD                        | 12 |
| <sup>13</sup> C-NMR spectrum of <b>6h</b> in CD <sub>3</sub> OD                       | 13 |
| <sup>1</sup> H-NMR spectrum of <b>6a</b> in DMSO-d <sub>6</sub>                       | 14 |

$^1\text{H}$ -NMR spectrum of **5d** in  $\text{CDCl}_3$ .

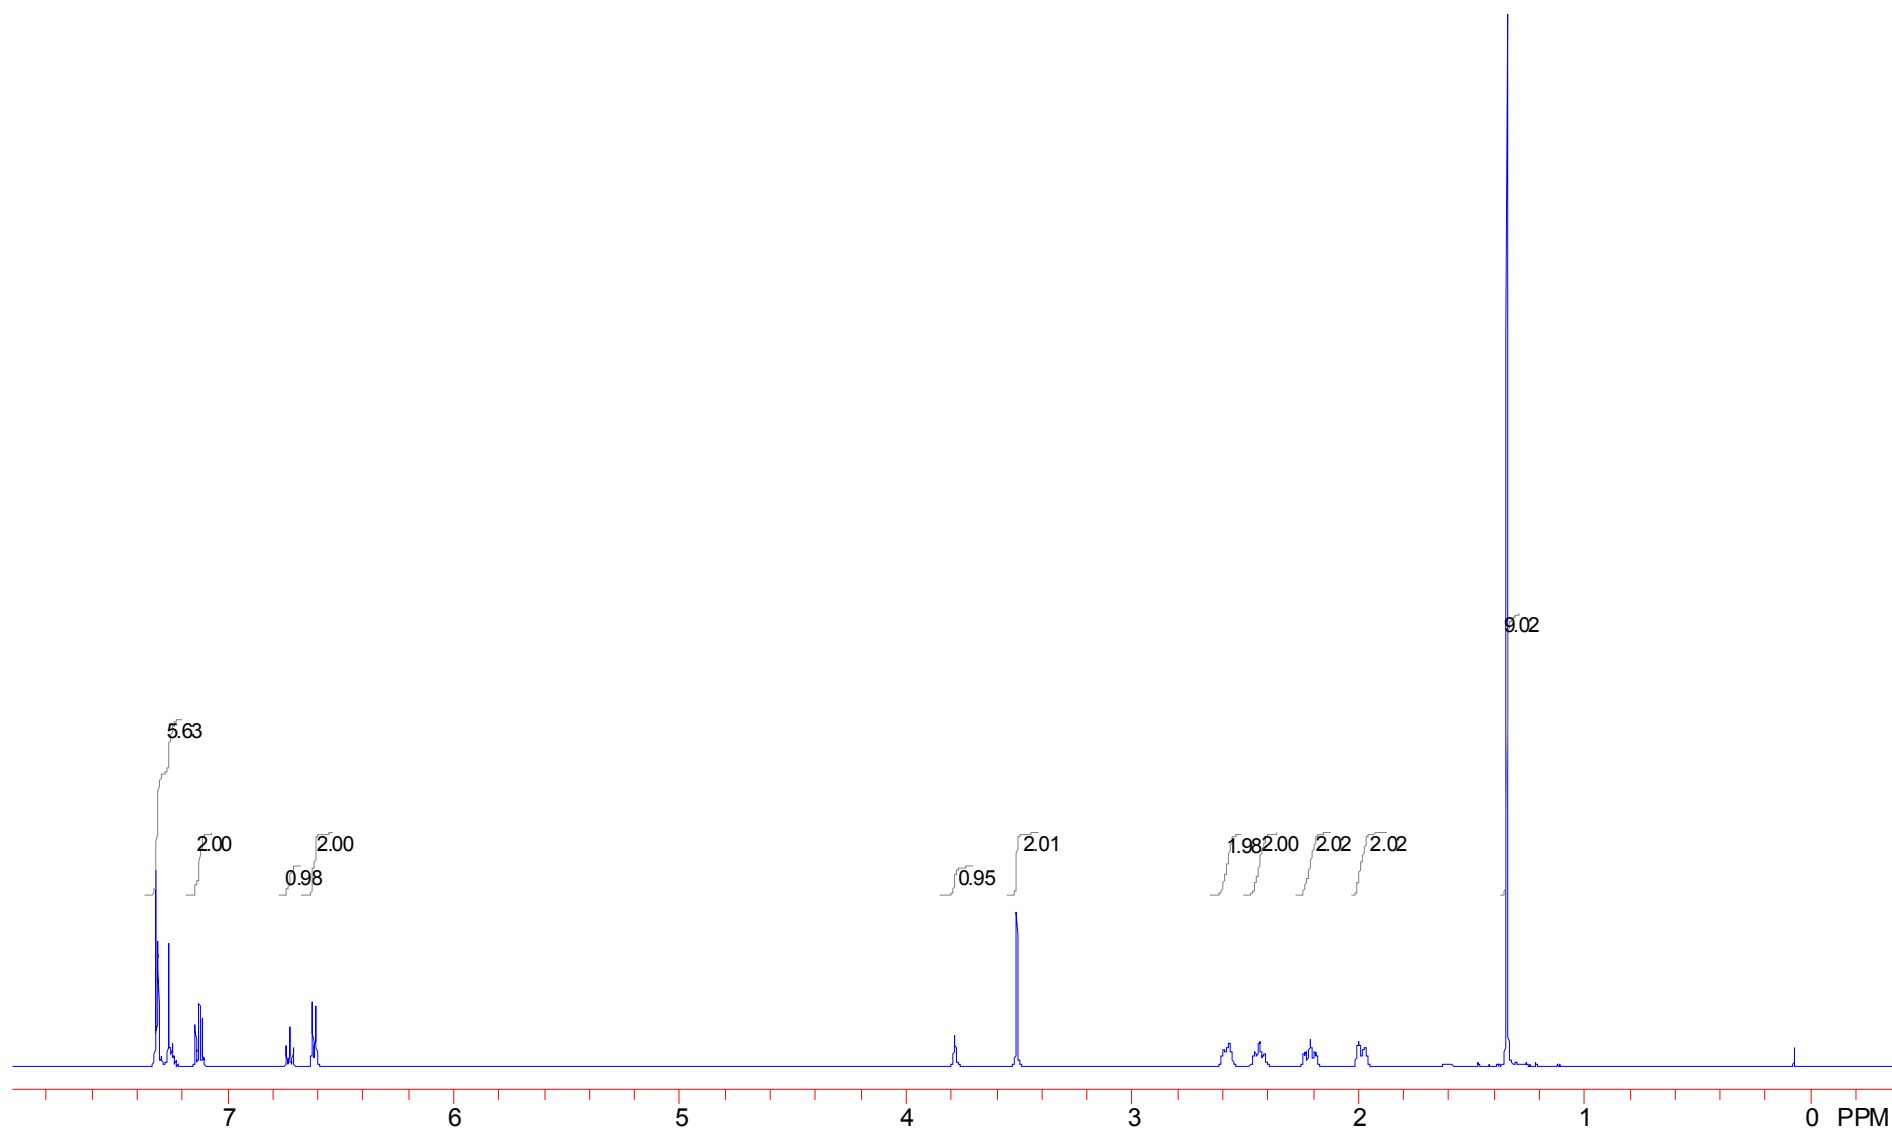

$^{13}\text{C}$ -NMR spectrum of **5d** in  $\text{CDCl}_3$ .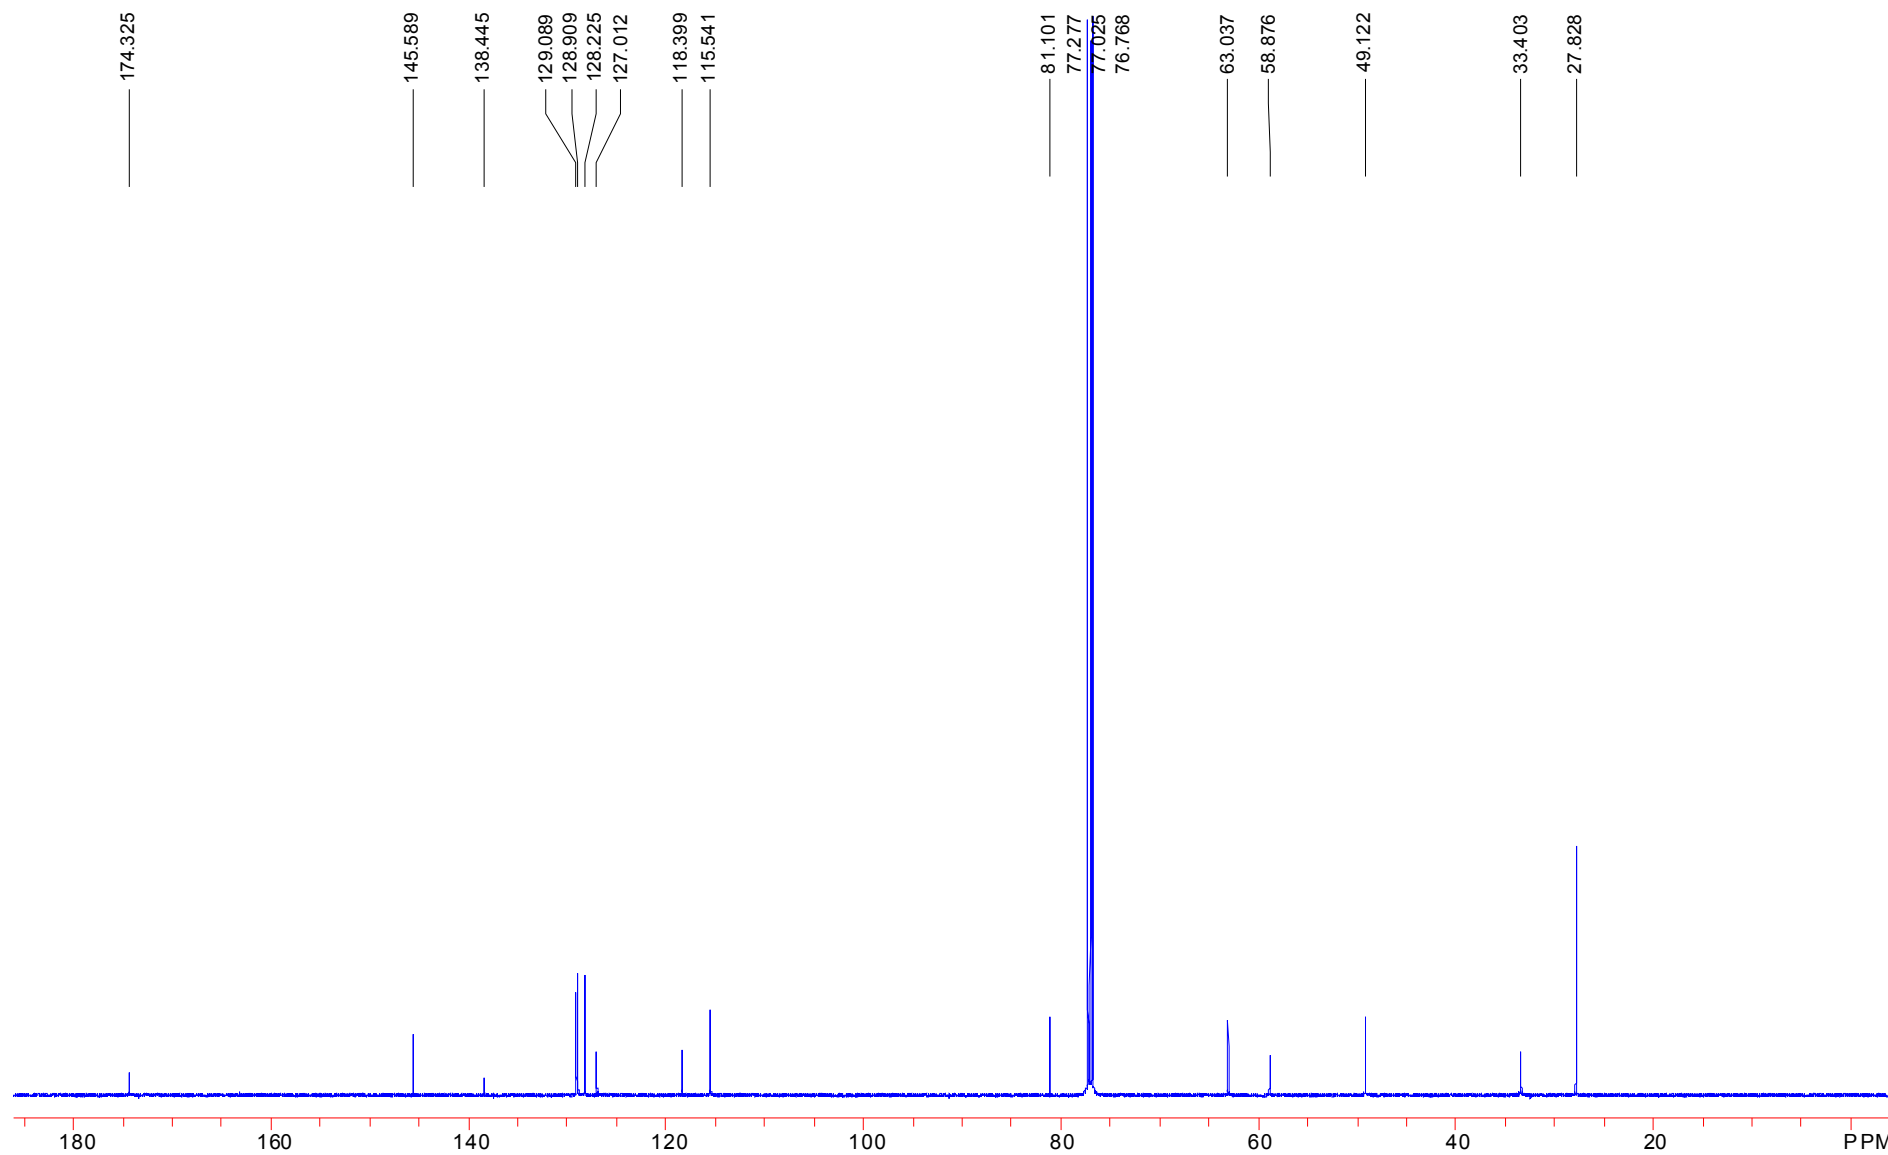

$^1\text{H}$ -NMR spectrum of **6d** in  $\text{CDCl}_3$ .

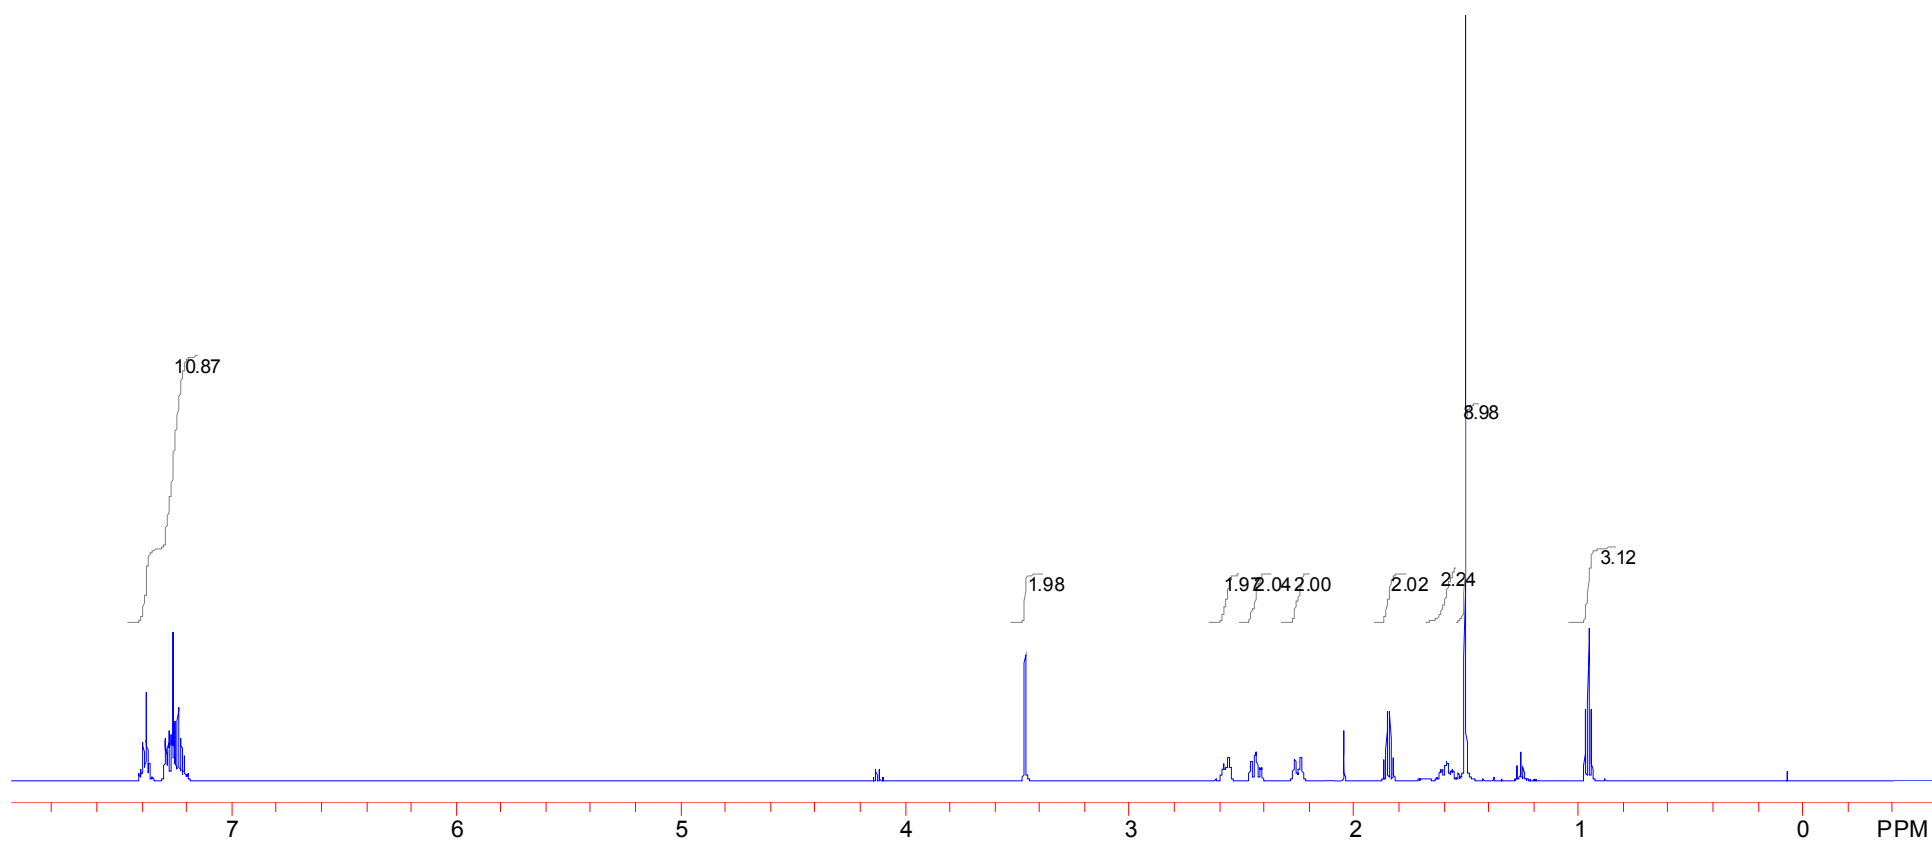

$^{13}\text{C}$ -NMR spectrum of **6d** in  $\text{CDCl}_3$ .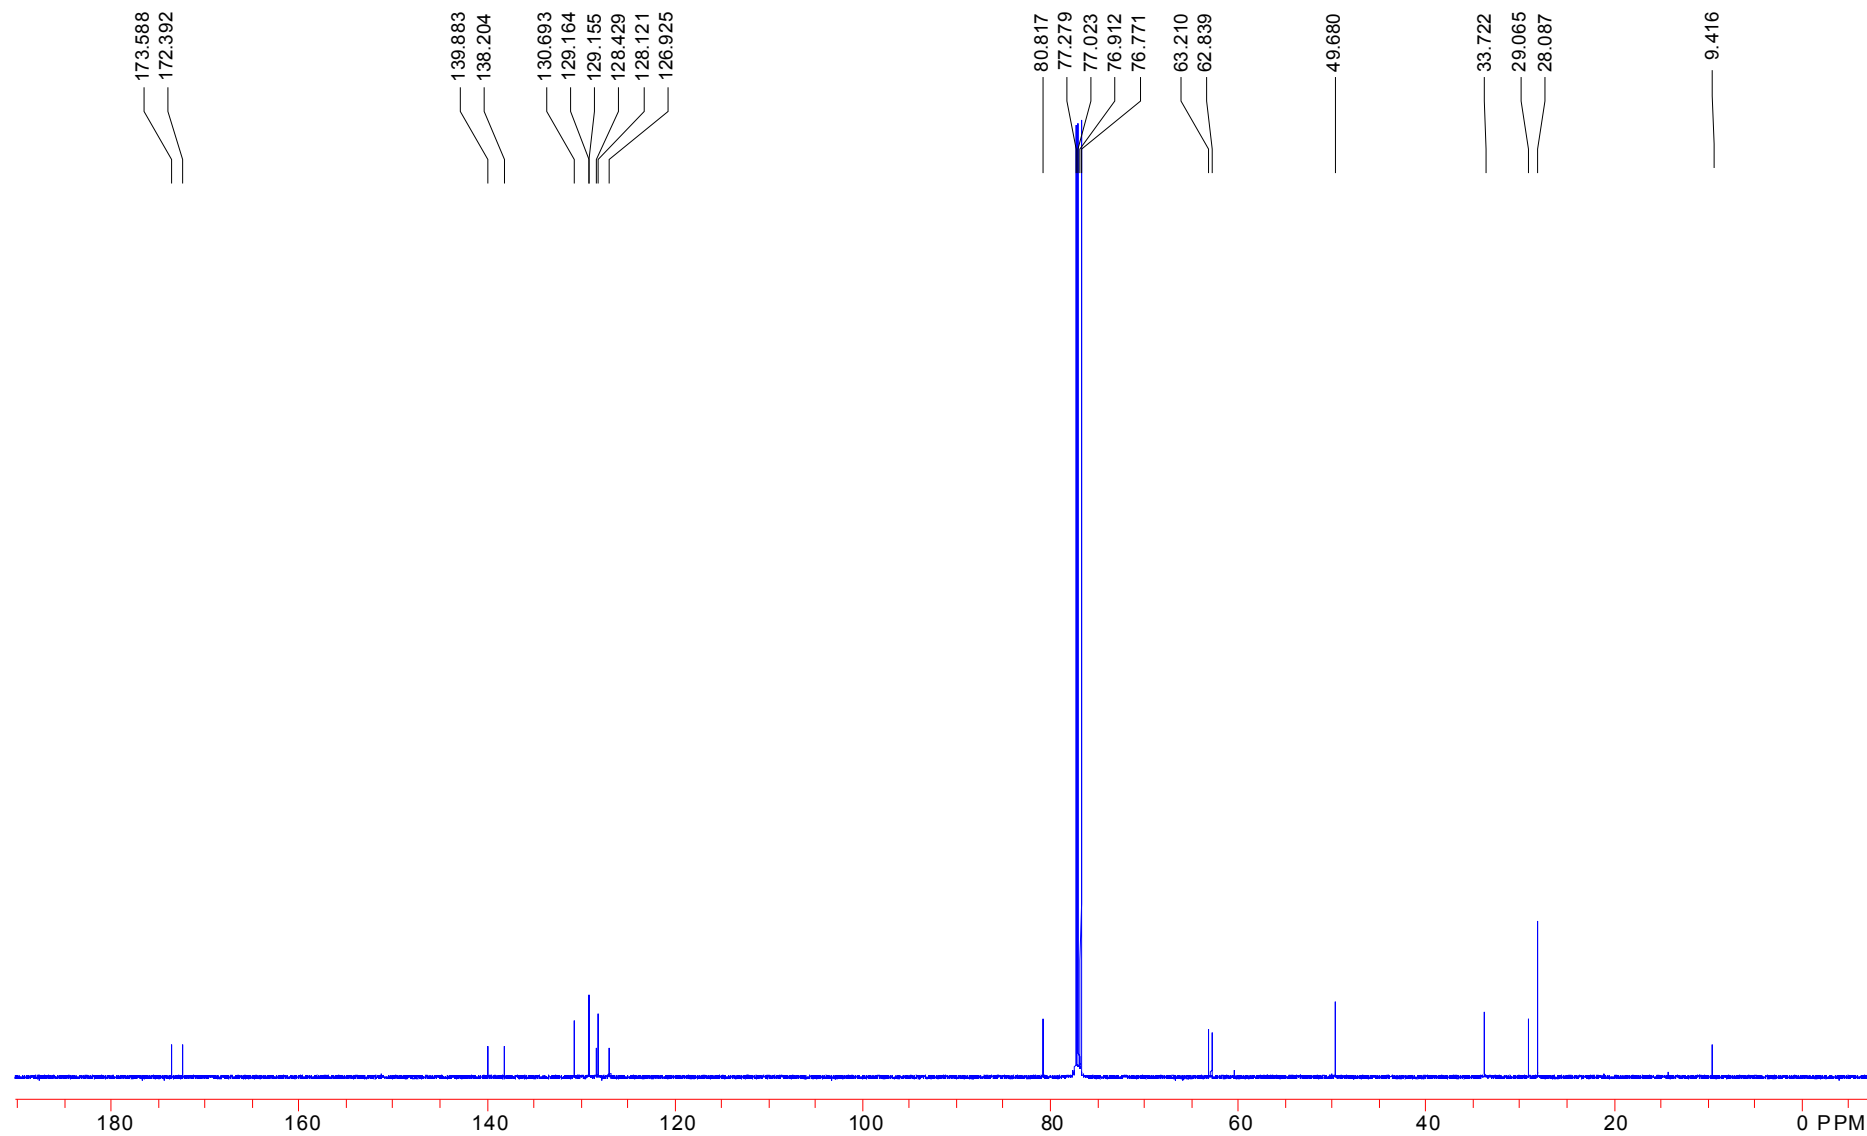

$^1\text{H}$ -NMR spectrum of **6e** in  $\text{CD}_3\text{OD}$ .

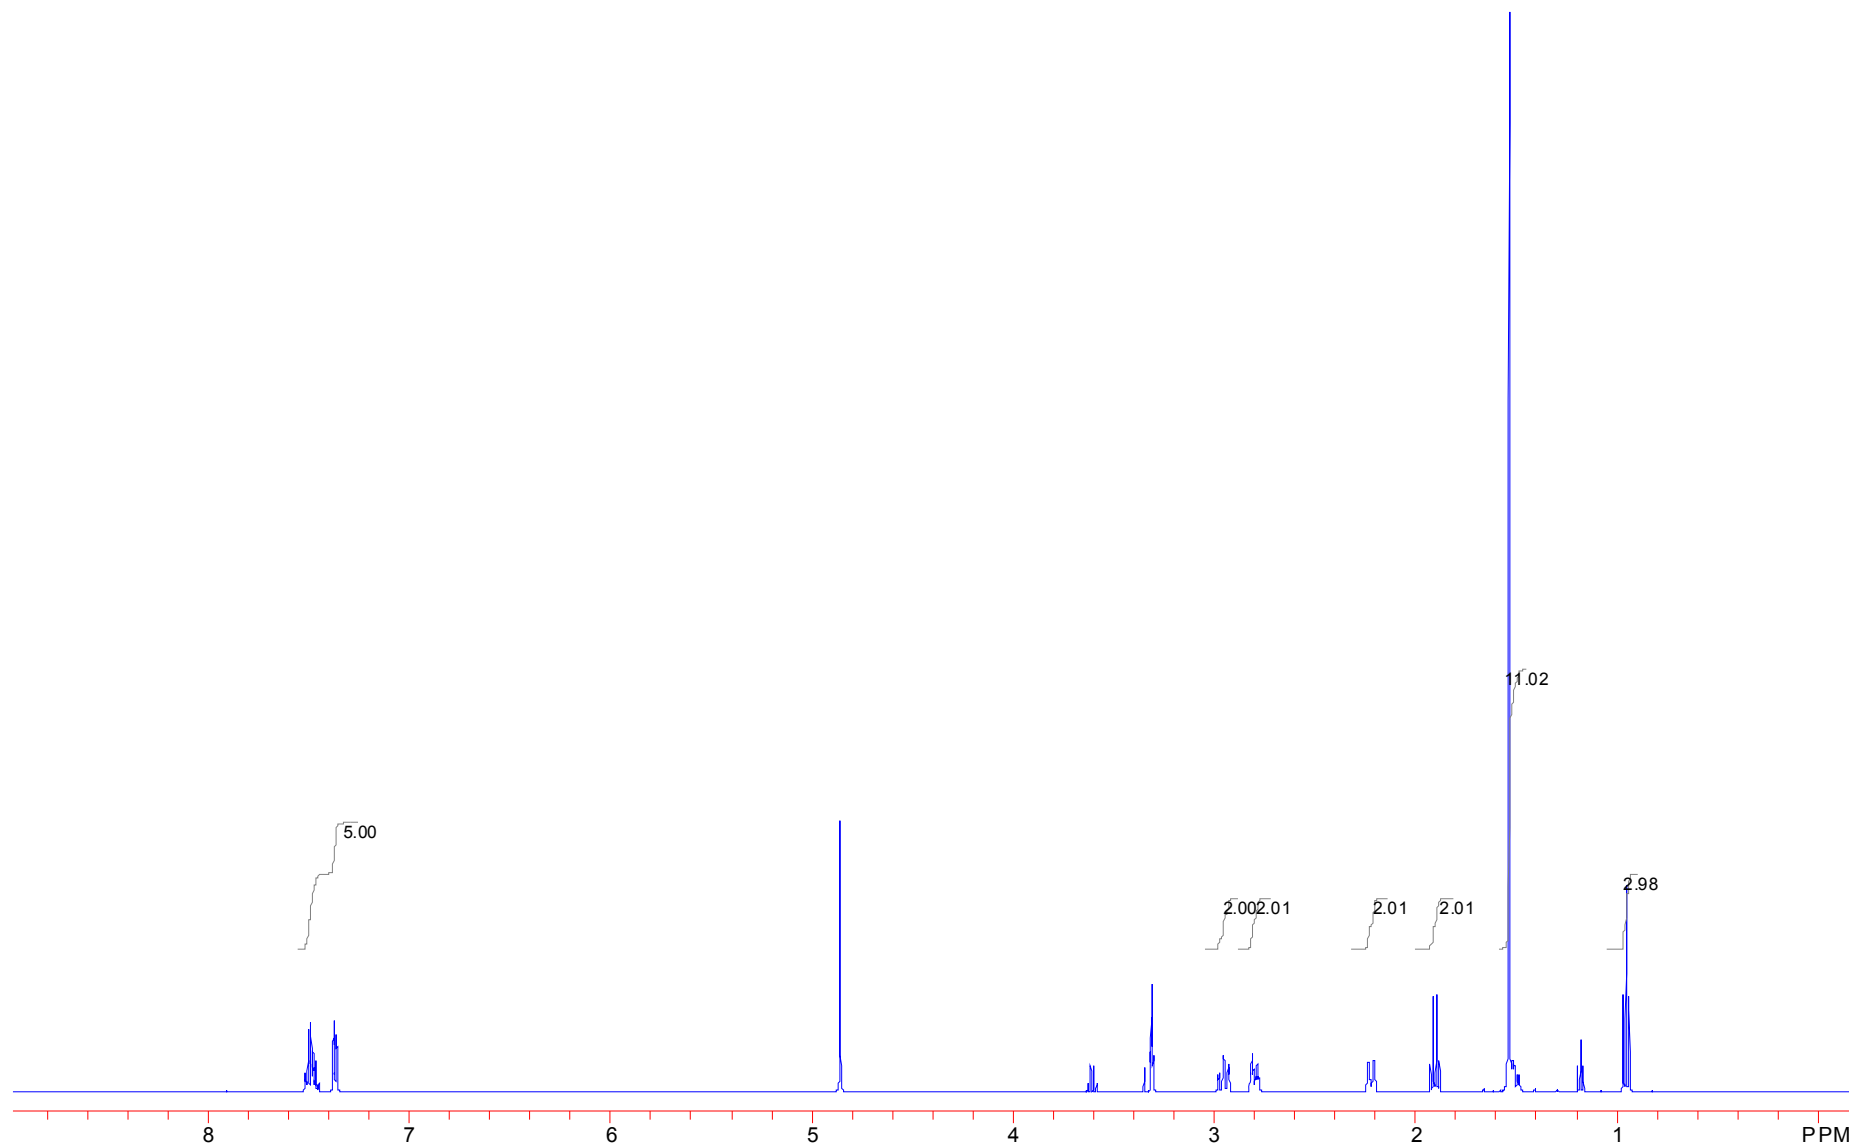

$^{13}\text{C}$ -NMR spectrum of **6e** in  $\text{CD}_3\text{OD}$ .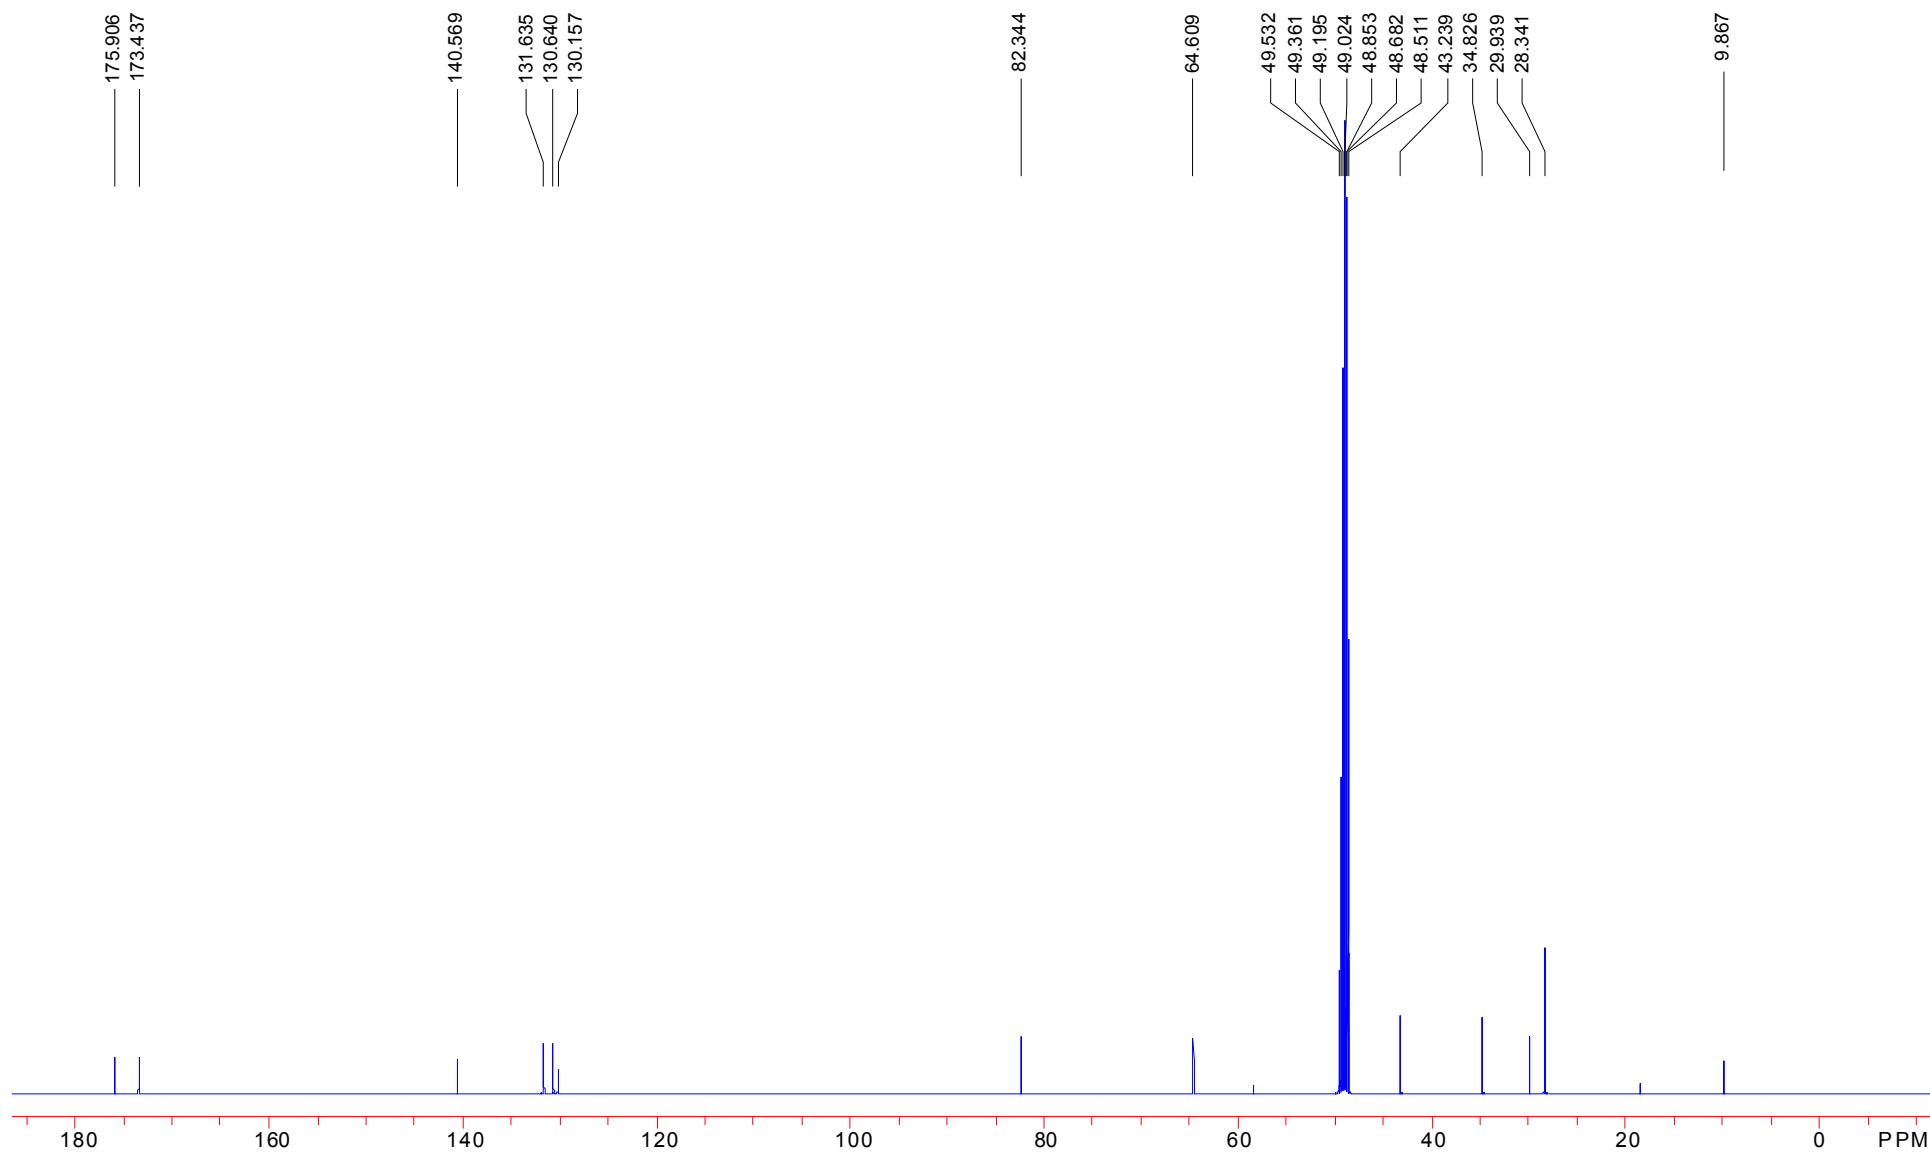

$^1\text{H}$ -NMR spectrum of **6f** in DMSO-d<sub>6</sub>.

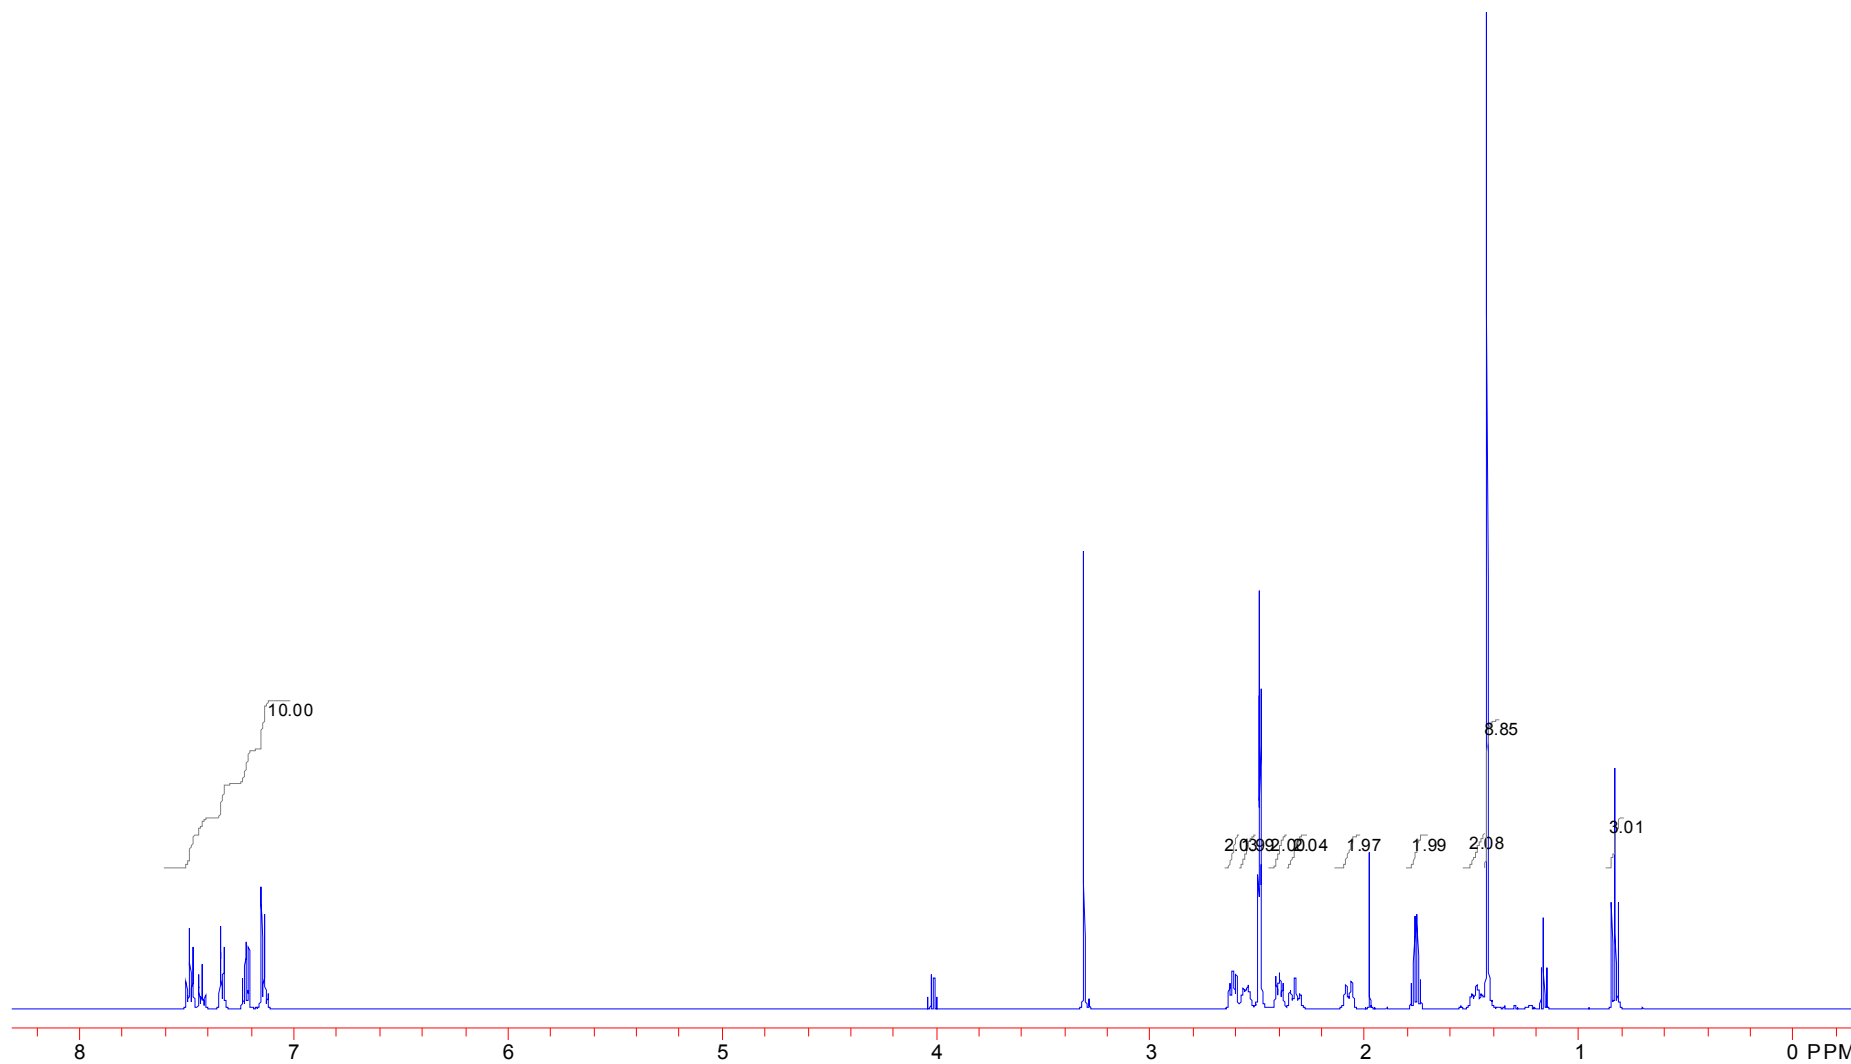

$^{13}\text{C}$ -NMR spectrum of **6f** in DMSO-d<sub>6</sub>.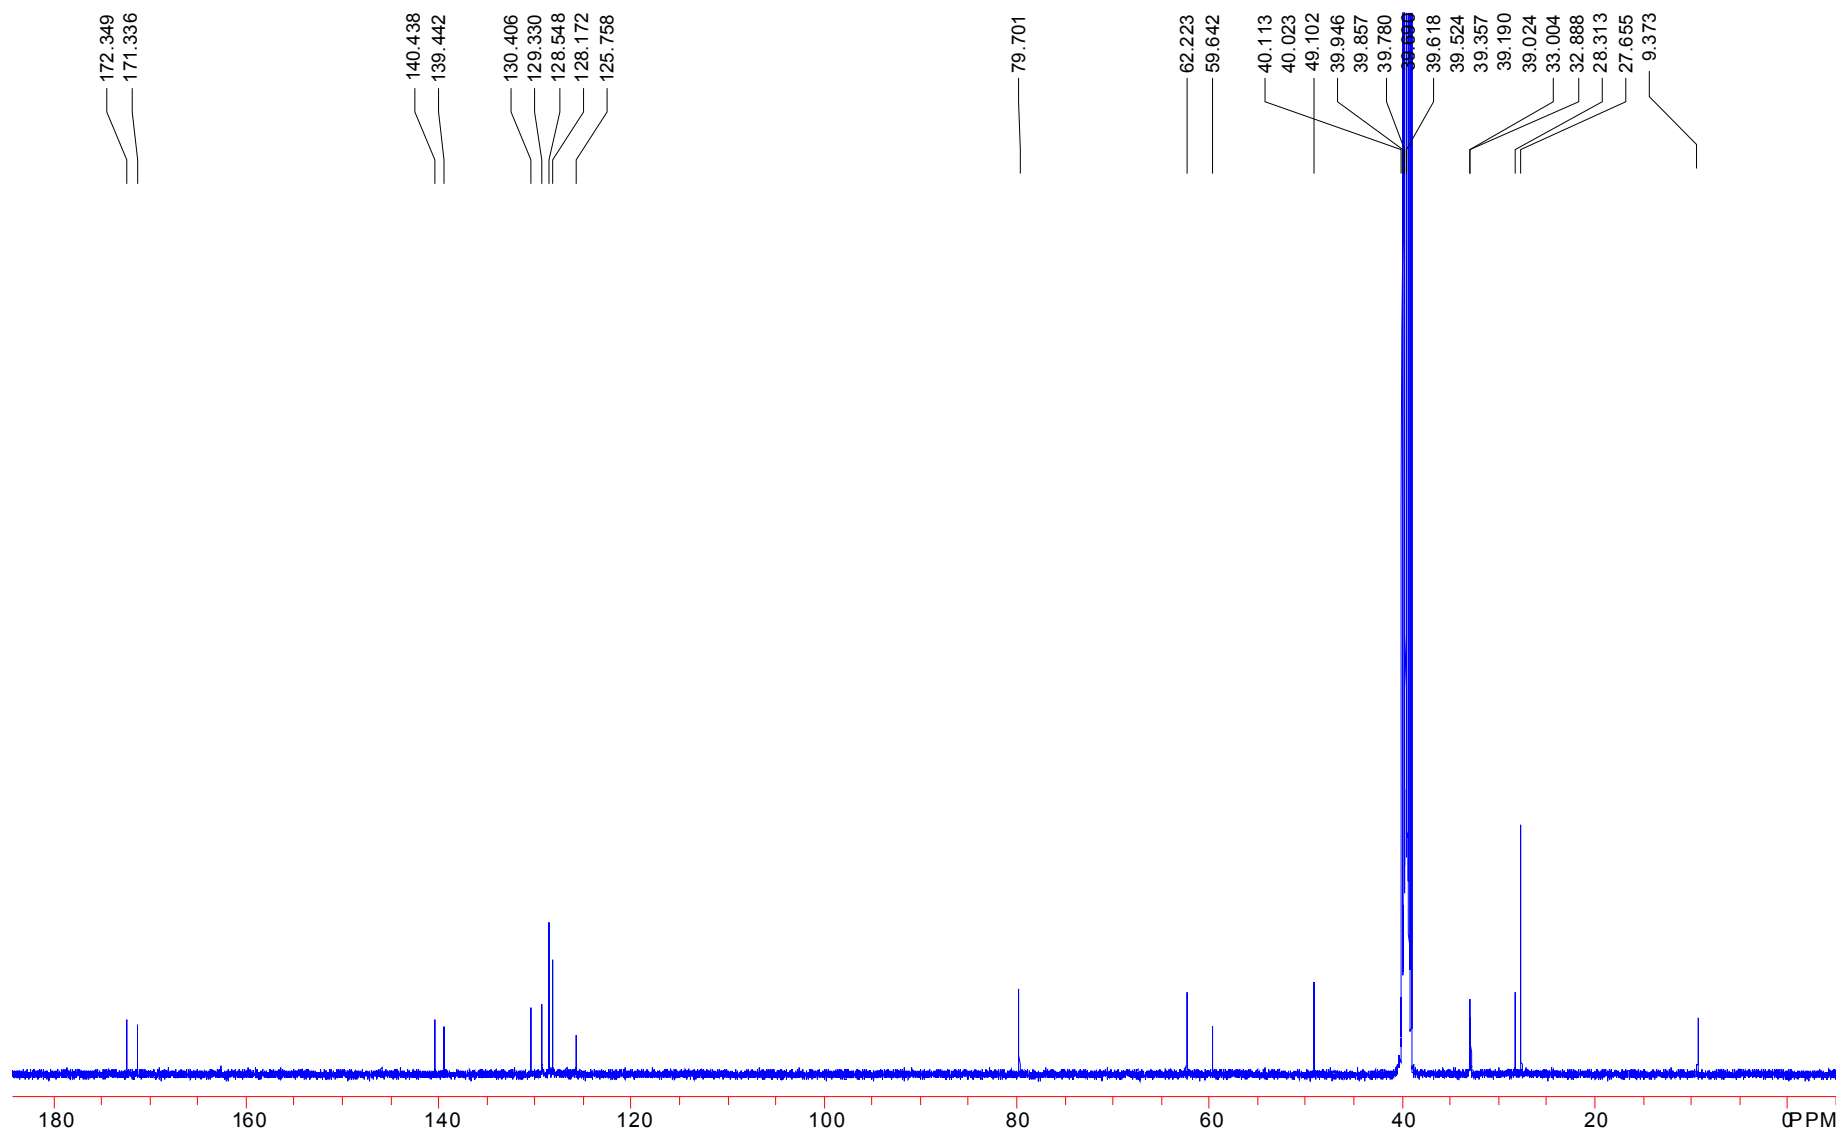

$^1\text{H}$ -NMR spectrum of **6g** in DMSO-d<sub>6</sub>.

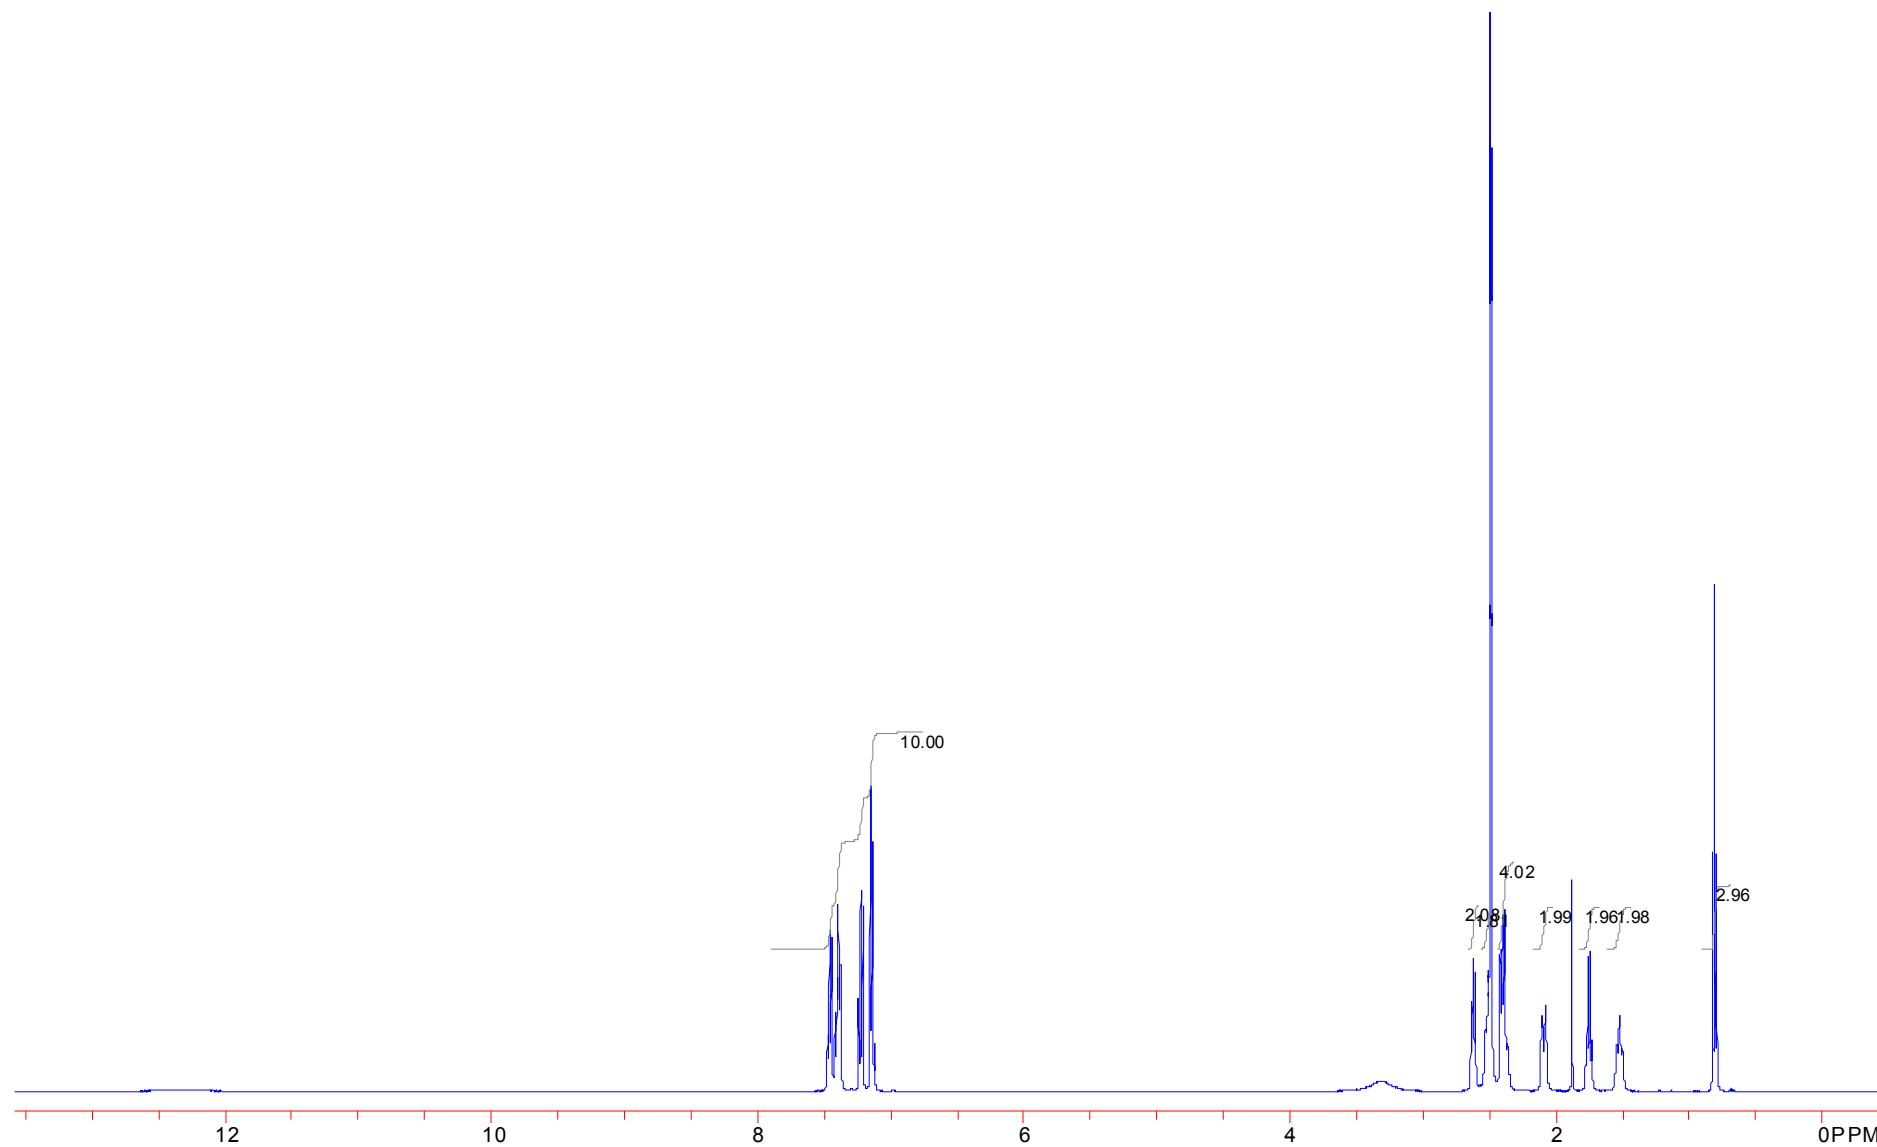

$^{13}\text{C}$ -NMR spectrum of **6g** in (DMSO-d<sub>6</sub> + CD<sub>3</sub>OD).

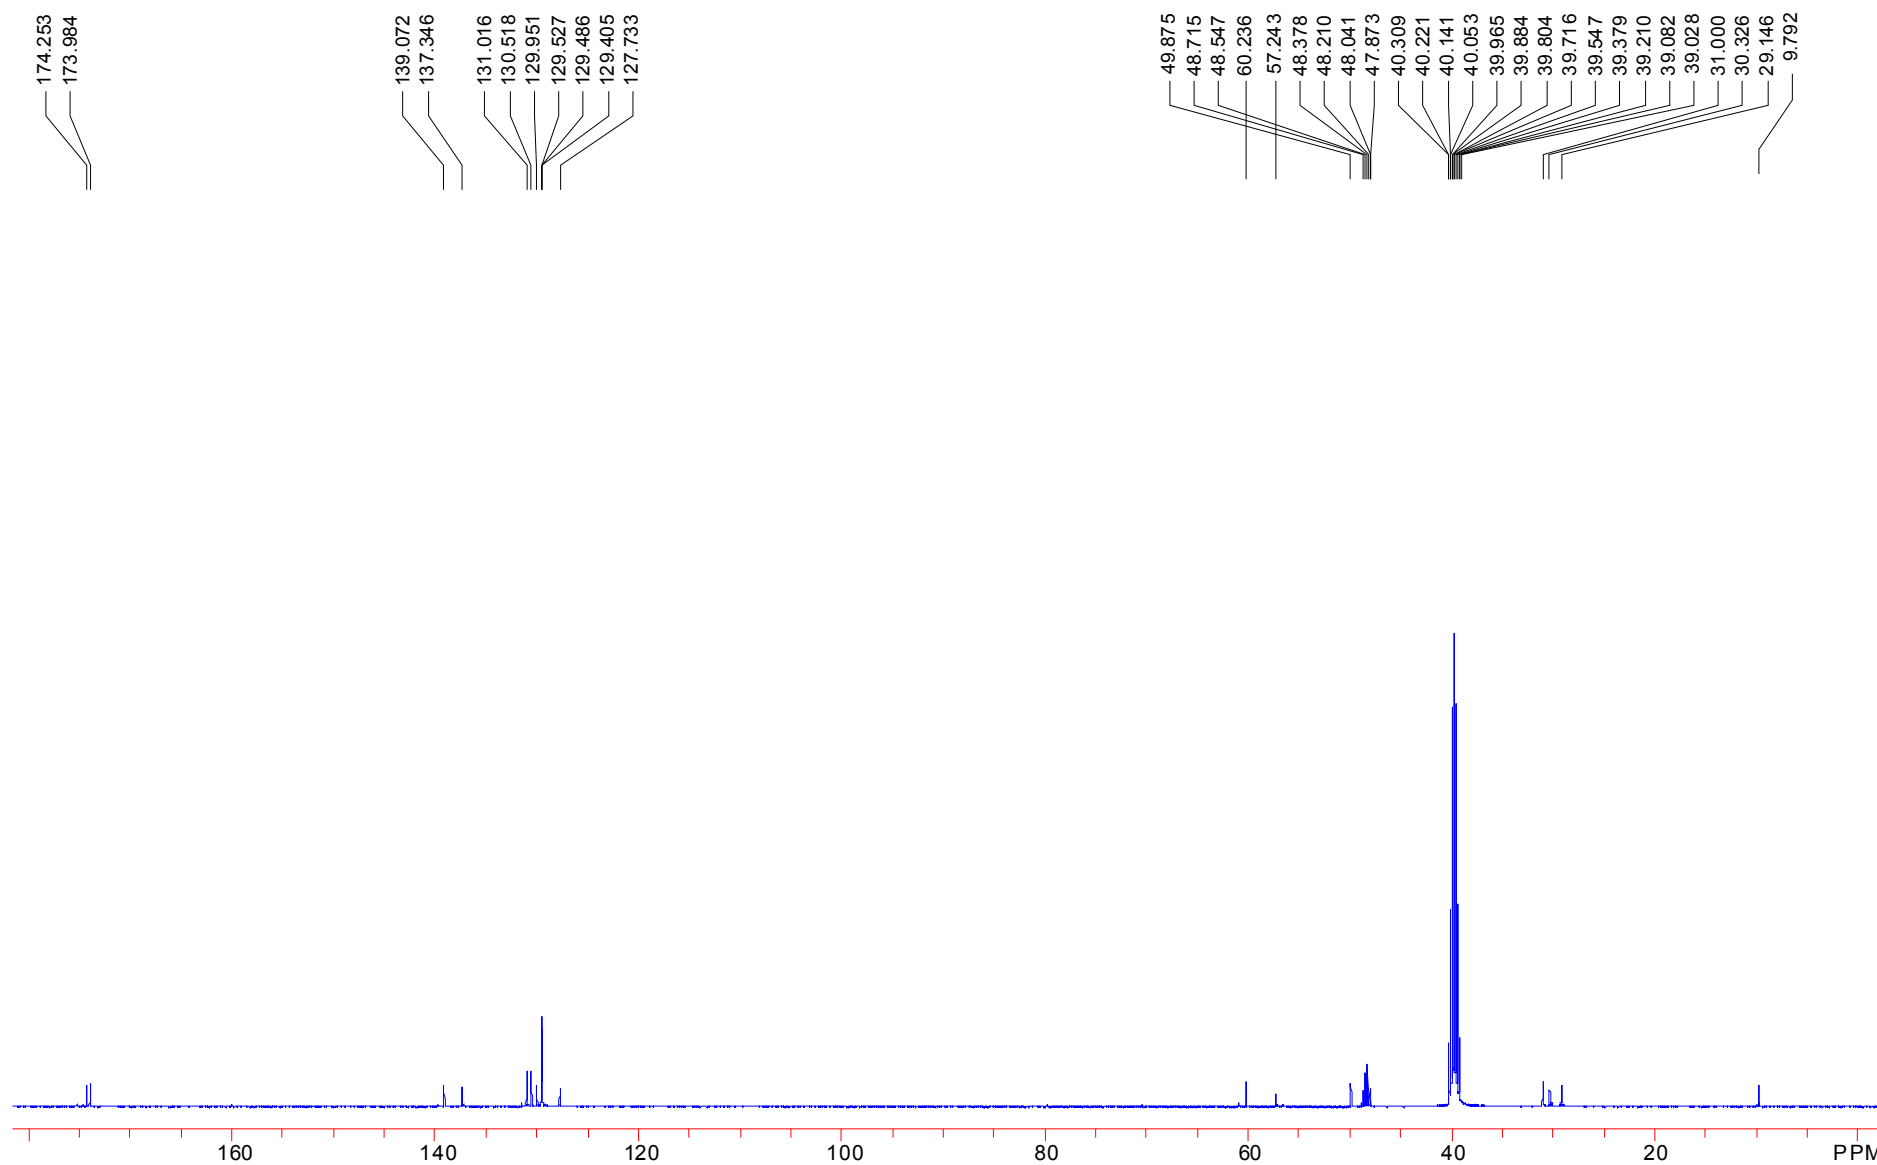

<sup>1</sup>H-NMR spectrum of **6h** in CD<sub>3</sub>OD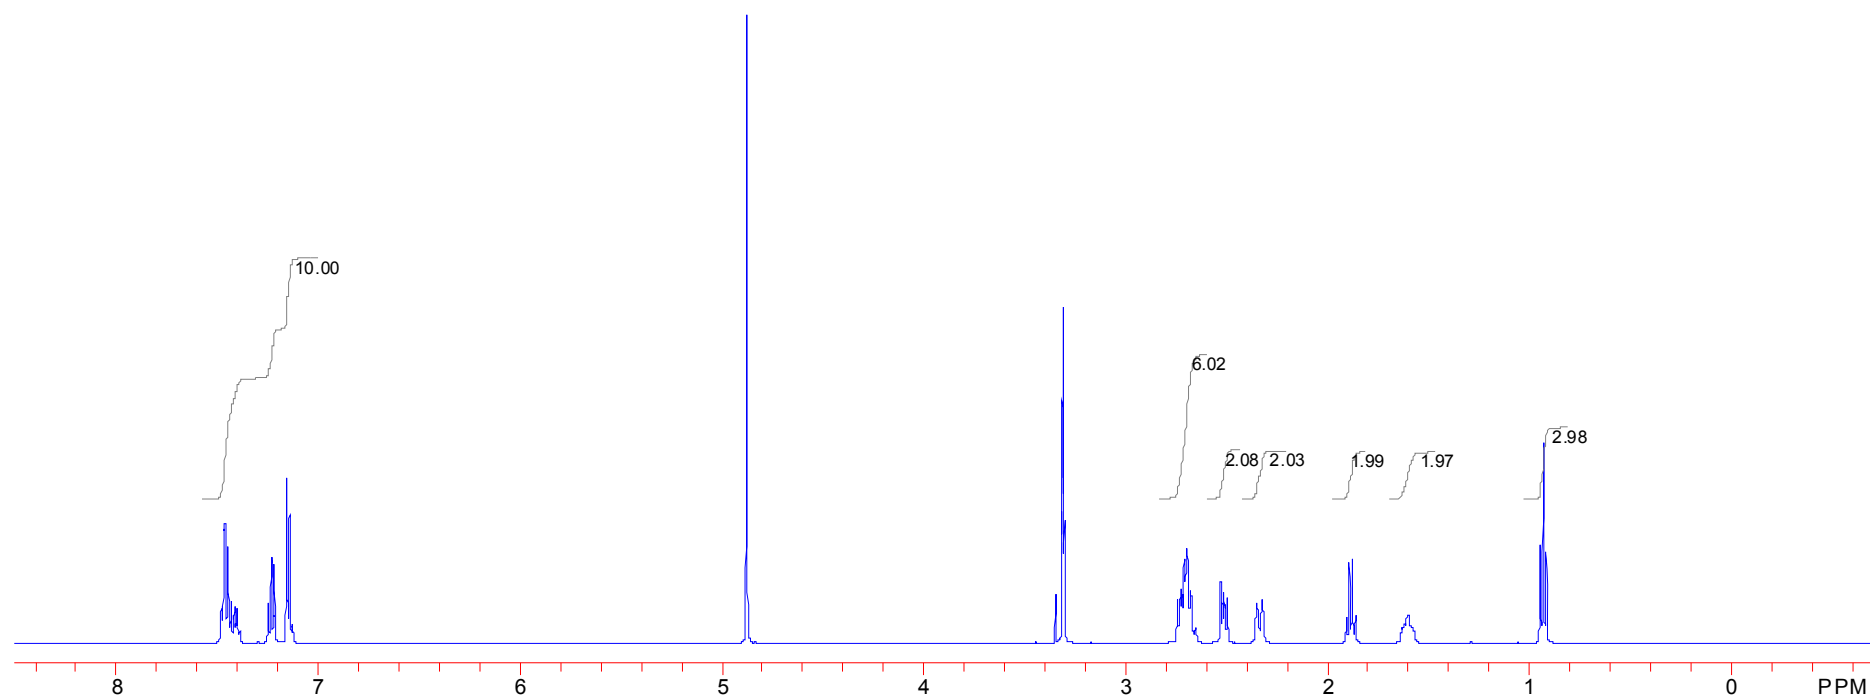

$^{13}\text{C}$ -NMR spectrum of **6h** in  $\text{CD}_3\text{OD}$ .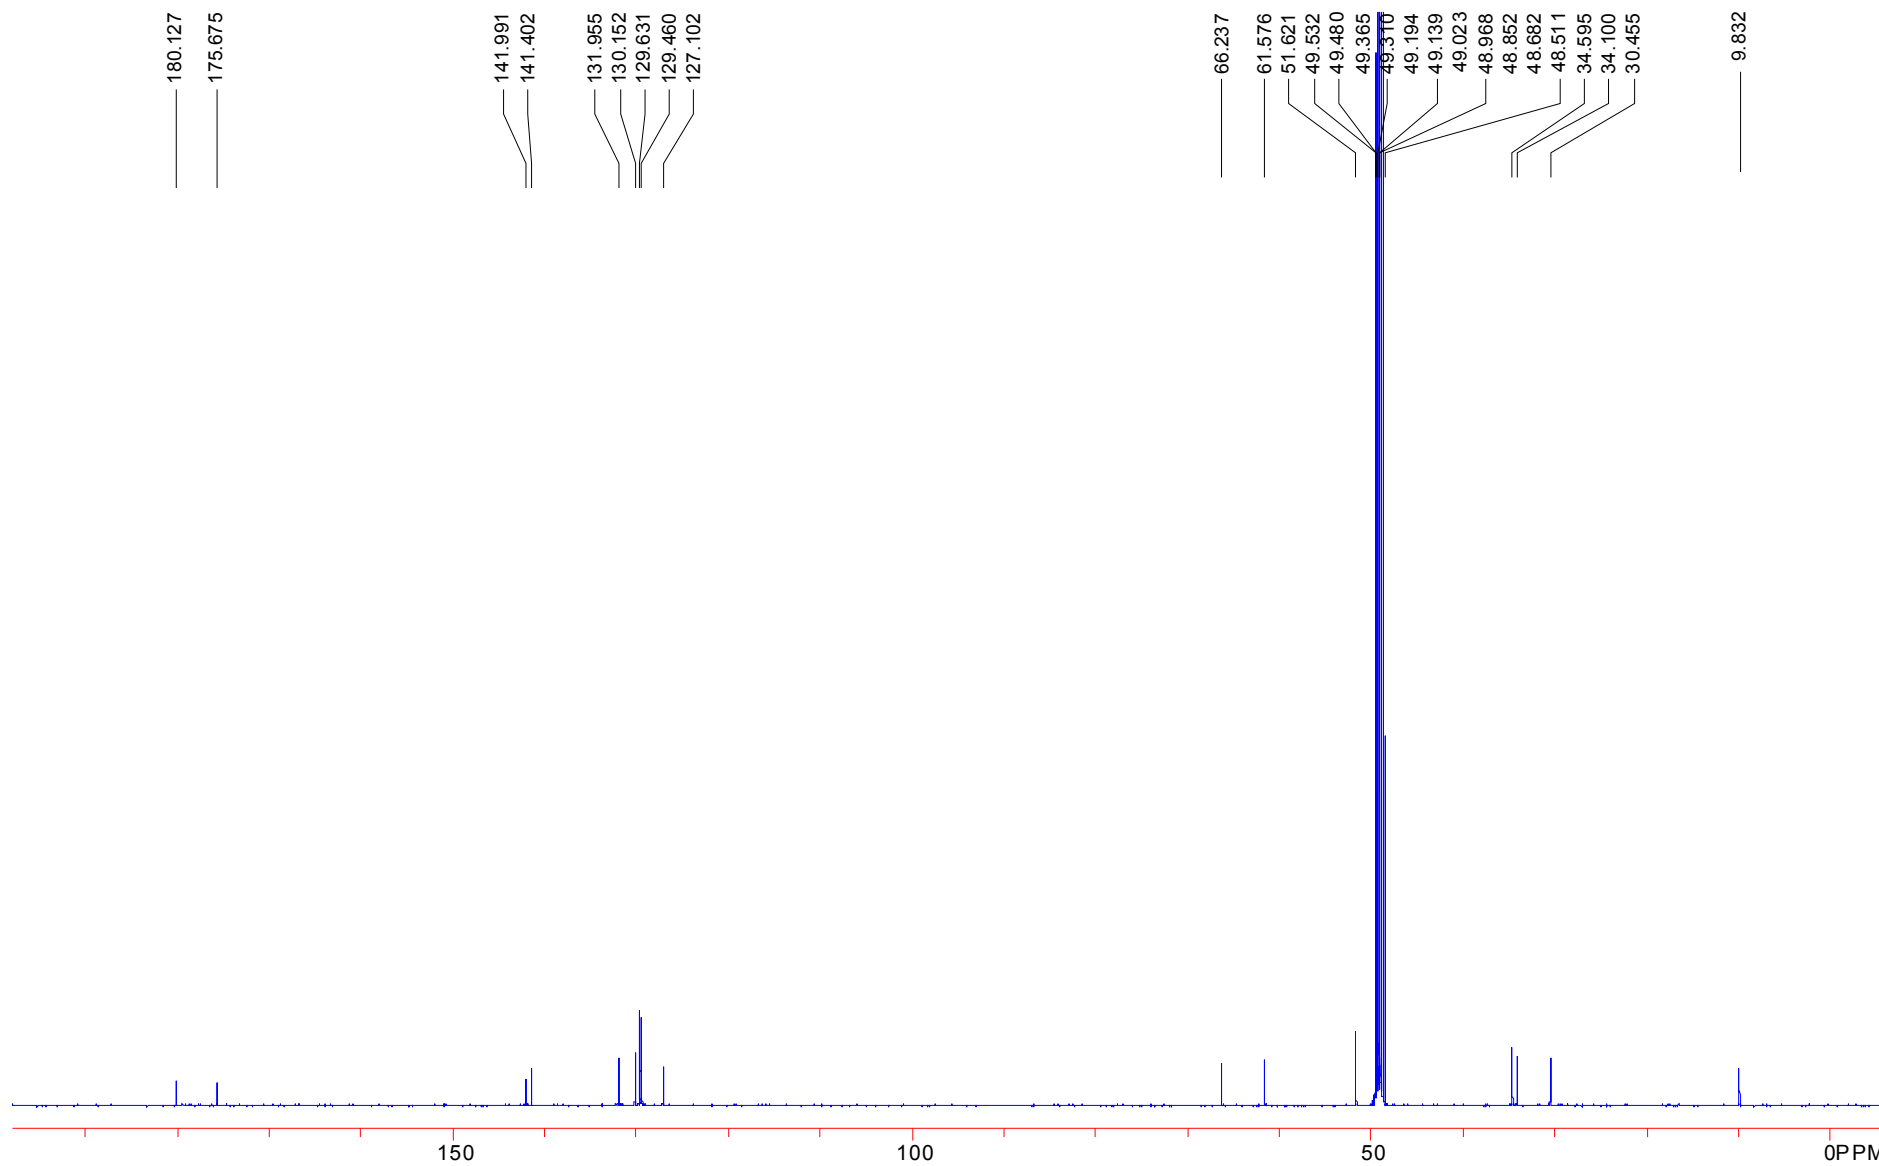

$^1\text{H}$ -NMR spectrum of **6a** in DMSO- $d_6$ .

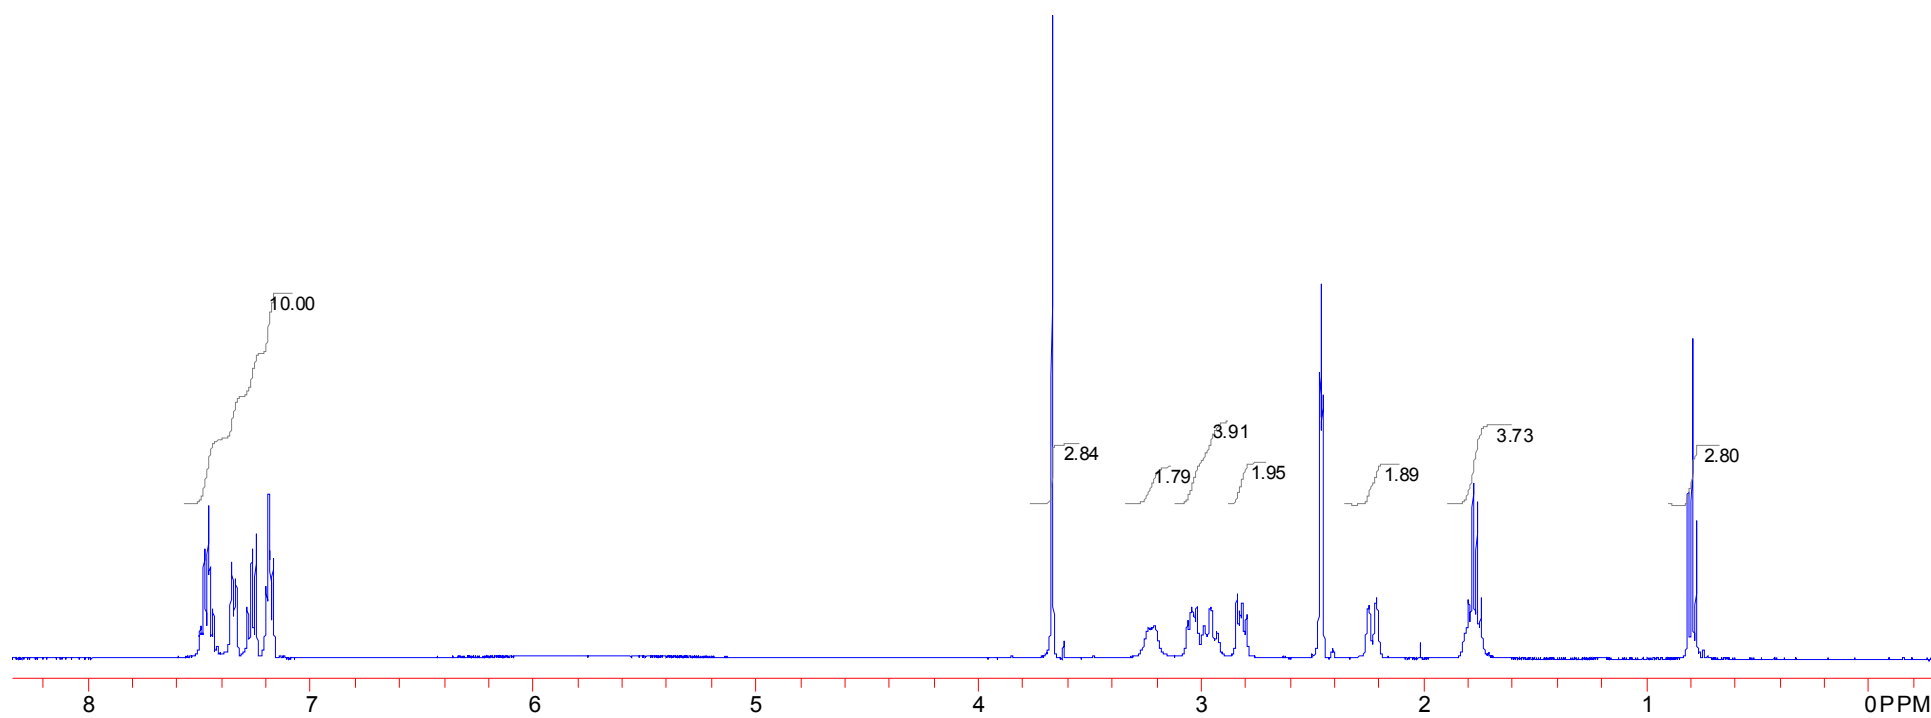

Supplement: Supplementary file 1 [file molecules-17-02823-s001.pdf]
